# Supplementary material for: Study of Temperature Anisotropy and Kappa Distribution Impacts on EMIC Waves in Multi-Species Magnetized Plasma
Source: Copernicus journal article supplement (doi:10.5194/angeo-2024-25), 2024-11-20
Supplement: Supplementary file [file angeo-2024-25-CC3-supplement.pdf]

Subject: Comments on Study of Temperature Anisotropy and Kappa Distribution Impacts on EMIC Waves in Multi-Species Magnetized Plasma

Comments

The present study builds upon foundational research such as Patel et al. (2011), which investigated the role of ion beam velocities and anisotropies on electromagnetic ion cyclotron (EMIC) waves in the auroral acceleration region. By introducing the Kappa distribution and multi-ion species dynamics, this study advances our understanding of wave-particle interactions under more generalized plasma conditions. The inclusion of temperature anisotropy and non-thermal particle effects enhances the theoretical framework for predicting EMIC wave behavior in the magnetosphere and beyond.

The integration of Kappa distribution complements earlier results by addressing non-thermal high-energy populations often present in space plasmas, extending the scope to environments such as the solar wind and planetary magnetospheres. Furthermore, the focus on multi-ion plasmas introduces realistic complexity by accounting for competing resonances from ions like H<sup>+</sup>, He<sup>+</sup>, and O<sup>+</sup>, a significant departure from the single-ion framework adopted in Patel et al. (2011).

Queries for Discussion:

1. How does the integration of the Kappa distribution refine earlier findings on EMIC wave growth driven by ion beam anisotropy?
2. What new insights emerge from the multi-ion plasma approach that were not addressed in single-ion studies like Patel et al. (2011)?
3. How do temperature anisotropy and Kappa indices jointly influence the growth length and resonant energy transfer in EMIC waves?
